# Supplementary material for: Genetic Diversity Analysis ofHypsizygus marmoreuswith Target Region Amplification Polymorphism
Source: Hindawi journal article supplement (doi:10.1155/2014/619746), 2014-01-01
Supplement: f1 [file 619746.f1.pdf]

Figure S1 Result of specific sequence by BLAST N

The screenshot shows the BLAST N search results page. The header includes the BLAST logo and navigation links: Home, Recent Results, Saved Strategies, and Help. The search title is "NCBI/BLAST/blastn suite/ Formatting Results - MRCF83ZY015". Below the title are links for "Edit and Resubmit", "Save Search Strategies", "Formatting options", and "Download". A "YouTube" icon and links for "How to read this page" and "Blast report description" are also present. The main content area is titled "Nucleotide Sequence (120 letters)". It displays the following information:

|                      |              |                      |                                         |
|----------------------|--------------|----------------------|-----------------------------------------|
| <b>Query ID</b>      | Id 37539     | <b>Database Name</b> | nr                                      |
| <b>Description</b>   | None         | <b>Description</b>   | Nucleotide collection (nt)              |
| <b>Molecule type</b> | nucleic acid | <b>Program</b>       | BLASTN 2.2.28+ <a href="#">Citation</a> |
| <b>Query Length</b>  | 120          |                      |                                         |

Below the table, a message states: "No significant similarity found. For reasons why, click here". A link for "Other reports: Search Summary" is provided. The footer contains copyright information, a disclaimer, and the NCBI logo.

Figure S2 Result of specific sequence by BLAST X

The screenshot shows the BLAST X search results page. The header includes the BLAST logo and navigation links: Home, Recent Results, Saved Strategies, and Help. The search title is "NCBI/BLAST/blastx/ Formatting Results - MRCKWTN101R". Below the title are links for "Edit and Resubmit", "Save Search Strategies", "Formatting options", and "Download". A "YouTube" icon and links for "How to read this page" and "Blast report description" are also present. The main content area is titled "Nucleotide Sequence (120 letters)". It displays the following information:

|                      |              |                      |                                                                                                                    |
|----------------------|--------------|----------------------|--------------------------------------------------------------------------------------------------------------------|
| <b>Query ID</b>      | Id 85685     | <b>Database Name</b> | nr                                                                                                                 |
| <b>Description</b>   | None         | <b>Description</b>   | All non-redundant GenBank CDS translations+PDB+SwissProt+PIR+PRF excluding environmental samples from WGS projects |
| <b>Molecule type</b> | nucleic acid | <b>Program</b>       | BLASTX 2.2.28+ <a href="#">Citation</a>                                                                            |
| <b>Query Length</b>  | 120          |                      |                                                                                                                    |

Below the table, a message states: "No significant similarity found. For reasons why, click here". A link for "Other reports: Search Summary" is provided. The footer contains copyright information, a disclaimer, and the NCBI logo.

Table S1 Information of the strains of *Hypsizygus marmoreus*

| No. | Strain Code | Origin                                                                                                                 | Strain Type         |
|-----|-------------|------------------------------------------------------------------------------------------------------------------------|---------------------|
| 1   | ACCC50474   | Dalian University of Technology, Dalian, Liaoning, China                                                               | storage stain       |
| 2   | ACCC51149   | Xin Yu Edible Fungi Institute, Wuhan, Hubei, China                                                                     | storage stain       |
| 3   | ACCC51533   | Institute of Agricultural Resources and Regional Planning,<br>Chinese Academy of Agricultural Sciences, Beijing, China | storage stain       |
| 4   | ACCC51661   | Huan Yu Edible Fungi Institute, Jiayu, Hubei, China                                                                    | storage stain       |
| 5   | ACCC51729   | Nanjing Agricultural University, Nanjing, Jiangsu, China                                                               | storage stain       |
| 6   | ACCC51800   | Shandong Agricultural University, Taian, Shandong, China                                                               | storage stain       |
| 7   | GDGM26168   | Shanghai Finc Bio-tech Inc., Shanghai, China                                                                           | commercial cultivar |
| 8   | GDGM26169   | Shandong Ronfun Group, Ltd., Dongying, Shandong, China                                                                 | commercial cultivar |
| 9   | GDGM26171   | Shanghai Tianchu Mushroom Co., Ltd., Shanghai, China                                                                   | commercial cultivar |
| 10  | GDGM26713   | Starway Bio-technology, Dongguan, Guangdong, China                                                                     | commercial cultivar |
| 11  | FJNK-1      | Fujian Academy of Agricultural Sciences, Fuzhou, China                                                                 | commercial cultivar |
| 12  | FJNK-2      | Fujian Academy of Agricultural Sciences, Fuzhou, China                                                                 | commercial cultivar |
| 13  | GSGY-2      | Gaoyou Institute of Edible Fungi, Gaoyou, Jiangsu, China                                                               | commercial cultivar |
| 14  | HN-1        | Hunan Academy of Agricultural Science, Changsha, Hunan, China                                                          | commercial cultivar |
| No. | Strain Code | Origin                                                                                                                 | Strain Type         |
| 15  | HN-2        | Hunan Academy of Agricultural Science, Changsha, Hunan, China                                                          | commercial cultivar |
| 16  | HBYC        | Yichang Kanghuiyuan Biology Technology Co., Ltd., Yichang,<br>Hubei, China                                             | commercial cultivar |
| 17  | SM-4        | Sanming Mycological Institute, Sanming, Fujian, China                                                                  | commercial cultivar |
| 18  | MYSYB       | Mianyang Edible Fungi Research Institute of Sichuan, Mianyang,<br>Sichuan, China                                       | commercial cultivar |
| 19  | SCNK        | Sichuan Academy of Agricultural Science, Chengdu, Sichuan,<br>China                                                    | commercial cultivar |

---

20 CBS-1

Changbaishan, Jilin, China

storage stain

---

Table S2 Fixed and arbitrary primers used in the TRAP analysis of *Hypsizygus marmoreus*

| Primers           | Sequence(5'→3')    | Origin                                                                          |
|-------------------|--------------------|---------------------------------------------------------------------------------|
| Fixed primers     |                    |                                                                                 |
| EF69R1            | TTGTGAGCTTAGGCGTTA | <i>H. marmoreus</i> serine protease mRNA<br>EF153269.2                          |
| GQ76L1            | CGTTCCTGCATACTTCAA | <i>H. marmoreus</i> heat shock protein 70 GQ246176.1                            |
| GQ76R1            | GCCTCTTCGATGAGATTC | <i>H. marmoreus</i> heat shock protein 70 GQ246176.1                            |
| EU94L1            | CGGAAAGCGTTATAGGTT | <i>H. marmoreus</i> laccase mRNA EU375894.1                                     |
| JN00R1            | TCCTCGGTGTACTCAACA | <i>H. marmoreus</i> gene glyceraldehyde-3-phosphate<br>dehydrogenase JN048800.1 |
| JN00L1            | GGGAGAAAGGGGTAGATT |                                                                                 |
| Arbitrary primers |                    |                                                                                 |
| ME1               | TGAGTCCAAACCGGATA  | Li & Quiros (2001)                                                              |
| ME2               | TGAGTCCAAACCGGAGC  |                                                                                 |
| ME4               | TGAGTCCAAACCGGACC  |                                                                                 |
| ME6               | TGAGTCCAAACCGGACA  |                                                                                 |
| ME7               | TGAGTCCAAACCGGACG  | Budak et al.(2005)                                                              |
| ME8               | TGAGTCCAAACCGGACT  |                                                                                 |
| ME9               | TGAGTCCAAACCGGAGG  |                                                                                 |
| ME11              | TGAGTCCAAACCGGAAC  |                                                                                 |
| ME13              | TGAGTCCAAACCGGAAG  |                                                                                 |
| EM1               | GACTGCGTACGAATTAAT | Li & Quiros (2001)                                                              |
| EM2               | GACTGCGTACGAATTTGC |                                                                                 |
| EM4               | GACTGCGTACGAATTTGA |                                                                                 |

---

|      |                    |                    |
|------|--------------------|--------------------|
| EM5  | GACTGCGTACGAATTAAC |                    |
| EM6  | GACTGCGTACGAATTGCA |                    |
| EM9  | GACTGCGTACGAATTCAG | Budak et al.(2005) |
| EM10 | GACTGCGTACGAATTCAT |                    |
| EM16 | GACTGCGTACGAATTGTC | Ren et al (2012)   |
| EM17 | GACTGCGTACGAATTTAG |                    |
| EM24 | GACTGCGTACGAATTATG |                    |
| EM26 | GACTGCGTACGAATTCGG |                    |

---

Table S3 Information of the sequences used to designed specific primers for *Hypsizigus marmoreus*.

| Name       | Sequence (3'-5')                     | Length | Size of prediction |
|------------|--------------------------------------|--------|--------------------|
| KC906199SP | Forward: CGA CGA ACG AGA CTG AAT     | 18     | 321                |
|            | Reverse: ATA CTG CGA AGA TGT GAT GA  | 20     |                    |
| KC906204SP | Forward: TCA GAA CAT CCA GCG TAA G   | 19     | 323                |
|            | Reverse: ACC TCT ACC ATC CAC CAT T   | 19     |                    |
| KC906207SP | Forward: TCA GAA CAT CCA GCG TAA G   | 19     | 323                |
|            | Reverse: ACC TCT ACC ATC CAC CAT T   | 19     |                    |
| KC906214SP | Forward: ATG CTG AGT TGT TGA ATG C   | 19     | 190                |
|            | Reverse: GCC ATC CGA TTG CTA CAT     | 18     |                    |
| KC906215SP | Forward: TTG CTG GTA TTT GGC TGT A   | 19     | 191                |
|            | Reverse: CGA CTG GAG TAA TGT GAA TAG | 21     |                    |
| KC906223SP | Forward: GCT TGT ATC CGT CGT GTA T   | 19     | 244                |
|            | Reverse: GGT AGT GGT AAC CTG AGT C   | 19     |                    |

|   |   |         |         |                                                  |          |   |   |   |   |
|---|---|---------|---------|--------------------------------------------------|----------|---|---|---|---|
| G | s |         |         |                                                  |          |   | s | s | A |
| e | i |         |         |                                                  |          |   | t | t | A |
| n | z |         |         |                                                  |          |   | a | a |   |
| b | e |         |         |                                                  |          |   | r | r | n |
| a | o |         |         |                                                  |          |   | t | a | u |
| n | f | Blast N | Blast X | Putative conserved domains (size, function name) | tBlast X | C | D | O | R |
| k | s |         |         |                                                  |          | S | n | F | n |
| A | e |         |         |                                                  |          |   | d | s | d |
| c | q |         |         |                                                  |          |   | e |   | e |
| c | u |         |         |                                                  |          |   | n |   | r |
| e | e |         |         |                                                  |          |   | d |   | o |
| s | n |         |         |                                                  |          |   | s |   | f |

| si | c |    |             |                  |                  |  | i  | i  | p |
|----|---|----|-------------|------------------|------------------|--|----|----|---|
| o  | e |    |             |                  |                  |  | z  | z  | r |
| n  |   |    |             |                  |                  |  | e  | e  | e |
|    |   |    |             |                  |                  |  |    |    | d |
|    |   |    |             |                  |                  |  |    |    | i |
|    |   |    |             |                  |                  |  |    |    | c |
|    |   |    |             |                  |                  |  |    |    | t |
|    |   |    |             |                  |                  |  |    |    | e |
|    |   |    |             |                  |                  |  |    |    | d |
|    |   |    |             |                  |                  |  |    |    | p |
|    |   |    |             |                  |                  |  |    |    | r |
|    |   |    |             |                  |                  |  |    |    | o |
|    |   |    |             |                  |                  |  |    |    | t |
|    |   |    |             |                  |                  |  |    |    | e |
|    |   |    |             |                  |                  |  |    |    | i |
|    |   |    |             |                  |                  |  |    |    | n |
| K  |   | 26 | No          | Laccaria bicolor | Laccaria bicolor |  | 6  | 8  |   |
| C  |   | 7  | significant | S238N-H82        | S238N-H82        |  | -  | -  |   |
| 9  | 9 | A  | similarity  | predicted        | hypothetical     |  | 1  | 1  |   |
| 0  | 0 | 20 | found       | protein partial  | protein partial  |  | 7  | 7  |   |
| 6  | 9 | 2  |             | mRNA,            | mRNA,            |  | 5/ | 5/ |   |
| 1  | 9 | 7  |             | Accession:       | Accession:       |  | 2  | 2  |   |
| 9  |   | G  |             | XP_001888969.    | XP_001888934.1   |  | 2  | 2  |   |
| 3  |   | 22 |             | 1                |                  |  | 8  | 8  |   |
|    |   | 3  |             |                  |                  |  | -  | -  | 2 |
|    |   | T  |             |                  |                  |  | 5  | 5  | 2 |
|    |   |    |             |                  |                  |  | 6  | 6  | 1 |
|    |   |    |             |                  |                  |  | 9/ | 9/ |   |
|    |   |    |             |                  |                  |  | 6  | 6  |   |
|    |   |    |             |                  |                  |  | 8  | 8  |   |
|    |   |    |             |                  |                  |  | 8  | 8  |   |
|    |   |    |             |                  |                  |  | -  | -  |   |
|    |   |    |             |                  |                  |  | 8  | 8  |   |
|    |   |    |             |                  |                  |  | 4  | 4  |   |
|    |   |    |             |                  |                  |  | 2  | 0  |   |

|                                      |             |                                                              |                                                                                                                                                              |                                                                                                                                                                                        |                                                                                                                                                                                                   |                            |   |                            |                            |             |
|--------------------------------------|-------------|--------------------------------------------------------------|--------------------------------------------------------------------------------------------------------------------------------------------------------------|----------------------------------------------------------------------------------------------------------------------------------------------------------------------------------------|---------------------------------------------------------------------------------------------------------------------------------------------------------------------------------------------------|----------------------------|---|----------------------------|----------------------------|-------------|
| K<br>C<br>9<br>0<br>6<br>1<br>9<br>4 | 5<br>6<br>4 | 19<br>3<br>A<br>13<br>7<br>C<br>13<br>4<br>G<br>10<br>0<br>T | No<br>significant<br>similarity<br>found                                                                                                                     | Trametes<br>vericolor<br>FP-10664 SS1,<br>accession:<br>EIW51173.1/<br>Agaricus<br>bisporus var.<br>bisporus H97<br>predictal protein<br>AGABI2DRAF<br>T, accession:<br>EKV42031.1     | Agaricus<br>bisporus clone<br>FWBA165-D07,<br>complete<br>sequenc,<br>accession:<br>AC253814.1                                                                                                    | 4<br>6<br>-<br>5<br>3<br>7 | 1 | 4<br>6<br>-<br>5<br>3<br>7 | 4<br>6<br>-<br>5<br>3<br>7 | 1<br>6<br>4 |
| K<br>C<br>9<br>0<br>6<br>1<br>9<br>5 | 8<br>0<br>0 | 18<br>6<br>A<br>14<br>8<br>C<br>24<br>9<br>G<br>21<br>7<br>T | No<br>significant<br>similarity<br>found                                                                                                                     | Laccaria bicolor<br>S238N-H82<br>predicted<br>protein (Cover<br>22%)                                                                                                                   | Laccaria bicolor<br>clone<br>JGIAHZW-15X,<br>complete<br>sequence (Cover<br>21%)                                                                                                                  | 6<br>1<br>-<br>3<br>0<br>0 | 1 | 6<br>1<br>-<br>3<br>0<br>0 | 6<br>1<br>-<br>3<br>0<br>0 | 8<br>0      |
| K<br>C<br>9<br>0<br>6<br>1<br>9<br>6 | 4<br>4<br>3 | 11<br>9<br>A<br>96<br>C<br>12<br>6<br>G<br>10<br>2<br>T      | Lepista<br>nebularis<br>isolate<br>AFTQL-1D<br>1495 18S<br>ribosomal<br>RNA gene<br>partial<br>sequence/Ric<br>honiella<br>asterospora<br>18 small<br>subnit | Trametes<br>versicolor<br>FP-101664 SS1<br>checkpoint-link<br>protein<br>(CHK1),<br>accession:<br>EIW51416.1/<br>Medicago<br>truncatula ATP<br>synthase<br>subunit beta,<br>accession: | Richoniella<br>asteropora 18S<br>small subunit<br>ribosomal RNA<br>gene, partial<br>sequence,<br>accession<br>JF76311.1/<br>unculturd<br>Ascomycota<br>clone BN4-51<br>18S ribosomal<br>RNA gene, | 0                          |   |                            |                            |             |



|                                      |             |                                                                   |                                                                       |                                                                                                       |  |                                                                                                       |                                 |   |                       |                                 |        |
|--------------------------------------|-------------|-------------------------------------------------------------------|-----------------------------------------------------------------------|-------------------------------------------------------------------------------------------------------|--|-------------------------------------------------------------------------------------------------------|---------------------------------|---|-----------------------|---------------------------------|--------|
|                                      |             |                                                                   | ribosomal RNA gene, partial sequence                                  | XP_003627732.1                                                                                        |  | partial sequence, accession GQ404768.1                                                                |                                 |   |                       |                                 |        |
| K<br>C<br>9<br>0<br>6<br>1<br>9<br>7 | 7<br>0<br>8 | 18<br>0<br>A<br>17<br>9<br>9<br>C<br>15<br>4<br>G<br>19<br>5<br>T | Serpula lacrymans var. lacrmans S7.3 hypothetical protein (Cover 22%) | No significant similarity found                                                                       |  | Zebrafish phospholipase mRNA (Cover 30%)                                                              | 0                               |   |                       |                                 |        |
| K<br>C<br>9<br>0<br>6<br>1<br>9<br>8 | 3<br>0<br>8 | 95<br>A<br>72<br>C<br>63<br>G<br>78<br>T                          | No significant similarity found                                       | Laccaria bicolor S238N-H82 predicted protein partial mRNA, Accession: XP_001889811.1 (XP_001889801.1) |  | Laccaria bicolor S238N-H82 predicted protein partial mRNA, Accession: XP_001889811.1 (XP_001889801.1) | 1<br>4<br>6<br>1<br>2<br>3<br>7 | - | 1<br>-<br>2<br>3<br>7 | 1<br>4<br>6<br>-<br>2<br>3<br>7 | 3<br>0 |
| K<br>C<br>9<br>0<br>6<br>1<br>9      | 9<br>0<br>9 | 12<br>9<br>A<br>11<br>2<br>C<br>11                                | No significant similarity found                                       | No significant similarity found                                                                       |  | No significant similarity found                                                                       | 0                               |   |                       |                                 |        |

|                                      |                                       |                                                              |                                                                                                                     |                                                                                                                     |                                                                                                                                                                          |                                                                                                               |                                 |  |  |             |
|--------------------------------------|---------------------------------------|--------------------------------------------------------------|---------------------------------------------------------------------------------------------------------------------|---------------------------------------------------------------------------------------------------------------------|--------------------------------------------------------------------------------------------------------------------------------------------------------------------------|---------------------------------------------------------------------------------------------------------------|---------------------------------|--|--|-------------|
| 9                                    |                                       | 6<br>G<br>11<br>2<br>T                                       |                                                                                                                     |                                                                                                                     |                                                                                                                                                                          |                                                                                                               |                                 |  |  |             |
| K<br>C<br>9<br>0<br>6<br>2<br>0<br>0 | 4<br>6<br>9                           | 12<br>9<br>A<br>11<br>2<br>C<br>11<br>6<br>G<br>11<br>2<br>T | No<br>significant<br>similarity<br>found                                                                            | Moniliophihora<br>perniciosa<br>FA553<br>hypothetical<br>protein<br>MPER_13238,<br>accession:<br>XP_002387823.<br>1 | RF+3:<br>42-200,<br>EYA-cons_<br>domain                                                                                                                                  | Pinus taeda clone<br>PT_7Ba2882K18<br>, complete<br>sequence,<br>accession:<br>AC241291.1                     | 0                               |  |  |             |
| K<br>C<br>9<br>0<br>6<br>2<br>0<br>1 | 1<br>0<br>7<br>5<br>G<br>25<br>8<br>T | 27<br>5<br>A<br>27<br>2<br>C<br>27<br>0<br>G<br>25<br>8<br>T | Hypsizygos<br>marmoreus<br>heat shock<br>protein 70<br>(HSP70)<br>mRNA<br>complete cds,<br>Accession:<br>GQ246176.1 | Hypsizygos<br>marmoreus heat<br>shock protein<br>70, Accession:<br>ACT33635.1                                       | RF+2:<br>10-1035,<br>NAD-GH<br>(superfamili<br>es); RF-3:<br>575-1060,<br>NBD_sugar<br>-kinase_HS<br>P70_action<br>superfamily<br>;1-1065,<br>dnaK<br>(Multi-dom<br>ain) | Hypsizygos<br>marmoreus heat<br>shock protein 70<br>(HSP70) mRNA<br>complete CDS,<br>Accession:<br>GQ246176.1 | 6<br>2<br>-<br>1<br>0<br>7<br>5 |  |  | 3<br>0<br>3 |
| K<br>C<br>9<br>0<br>6<br>2           | 1<br>3<br>3<br>8<br>6<br>C            | 30<br>5<br>A<br>38<br>6<br>C                                 | Laccaria<br>bicolor<br>S238N-H82<br>predicted<br>protein<br>(Query cover                                            | No significant<br>similarity found                                                                                  | RF-3:<br>500-600,<br>Bactofilin                                                                                                                                          | Laccaria bicolor<br>S238N-H82<br>predicted protein<br>partial mRNA<br>(Query cover                            | 1<br>4<br>0<br>-<br>9<br>7      |  |  | 1<br>9<br>4 |

|                                      |             |                                                              |                                          |                                                                                                                          |                                                        |                                                                                                               |                            |   |  |             |
|--------------------------------------|-------------|--------------------------------------------------------------|------------------------------------------|--------------------------------------------------------------------------------------------------------------------------|--------------------------------------------------------|---------------------------------------------------------------------------------------------------------------|----------------------------|---|--|-------------|
| 0<br>2                               |             | 31<br>6<br>G<br>33<br>1<br>T                                 | 39%)                                     |                                                                                                                          |                                                        | 36%)                                                                                                          | 0                          |   |  |             |
| K<br>C<br>9<br>0<br>6<br>2<br>0<br>3 | 5<br>1<br>0 | 12<br>4<br>A<br>12<br>6<br>C<br>12<br>6<br>G<br>13<br>4<br>T | No<br>significant<br>similarity<br>found | Agaricus<br>bisporus var.<br>burnethii<br>hypothetical<br>protein<br>AGABI2DEAF<br>T_182914,<br>accession:<br>EKM82322.1 |                                                        | Laccaria bicolor<br>S238N-H82<br>hypothetical<br>protein partial<br>mRNA,<br>accession:<br>XM_001994024.<br>1 | 0                          |   |  |             |
| K<br>C<br>9<br>0<br>6<br>2<br>0<br>4 | 9<br>2<br>7 | 26<br>7<br>A<br>21<br>2<br>C<br>24<br>5<br>G<br>20<br>3<br>T | No<br>significant<br>similarity<br>found | No significant<br>similarity found                                                                                       |                                                        | No significant<br>similarity found                                                                            | 0                          |   |  |             |
| K<br>C<br>9<br>0<br>6<br>2<br>0      | 8<br>9<br>3 | 24<br>3<br>A<br>19<br>7<br>C<br>21                           | No<br>significant<br>similarity<br>found | Laccaria bicolor<br>S238N-H82<br>glycoside<br>hydrolase<br>family 47<br>protein,<br>accession:                           | RF-1:<br>740-550,<br>Glyco_hydr<br>o_47<br>Superfamily | No high<br>similarity<br>sequence over<br>25%                                                                 | 6<br>5<br>-<br>7<br>8<br>9 | 1 |  | 1<br>5<br>2 |

|                                      |                                       |                                                              |                                                                                                                     |                                                                               |                                                                                                                                                                                   |                                                                                                               |                                 |  |  |  |             |
|--------------------------------------|---------------------------------------|--------------------------------------------------------------|---------------------------------------------------------------------------------------------------------------------|-------------------------------------------------------------------------------|-----------------------------------------------------------------------------------------------------------------------------------------------------------------------------------|---------------------------------------------------------------------------------------------------------------|---------------------------------|--|--|--|-------------|
| 5                                    |                                       | 9<br>G<br>23<br>4<br>T                                       |                                                                                                                     | XP_001881296.<br>1                                                            |                                                                                                                                                                                   |                                                                                                               |                                 |  |  |  |             |
| K<br>C<br>9<br>0<br>6<br>2<br>0<br>6 | 1<br>0<br>7<br>4<br>G<br>25<br>6<br>T | 27<br>4<br>A<br>27<br>2<br>C<br>27<br>2<br>G<br>25<br>6<br>T | Hypsizygos<br>marmoreus<br>heat shock<br>protein 70<br>(HSP70)<br>mRNA<br>complete cds,<br>Accession:<br>GQ246176.1 | Hypsizygos<br>marmoreus heat<br>shock protein<br>70, Accession:<br>ACT33635.1 | RF+3:<br>10-1065,<br>NAD-GH<br>(superfami<br>les); RF-2:<br>560-1075,<br>NBD_sugar<br>-kinase_HS<br>P70_actin<br>superfamily<br>; RF-2:<br>1-1070,<br>dnaK<br>(Multi-dom<br>ains) | Hypsizygos<br>marmoreus heat<br>shock protein 70<br>(HSP70) mRNA<br>complete CDS,<br>Accession:<br>GQ246176.1 | 6<br>3<br>-<br>1<br>7<br>0<br>4 |  |  |  | 3<br>0<br>2 |
| K<br>C<br>9<br>0<br>6<br>2<br>0<br>7 | 9<br>5<br>5                           | 27<br>0<br>A<br>22<br>1<br>C<br>25<br>3<br>G<br>21<br>1<br>T | No<br>significant<br>similarity<br>found                                                                            | No significant<br>similarity found                                            |                                                                                                                                                                                   | No significant<br>similarity found                                                                            | 0                               |  |  |  |             |
| K<br>C<br>9<br>0<br>6                | 7<br>5<br>7                           | 17<br>2<br>A<br>19<br>1                                      | No<br>significant<br>similarity<br>found                                                                            | No high<br>similarity<br>sequence over<br>29%                                 |                                                                                                                                                                                   | No significant<br>similarity found                                                                            | 0                               |  |  |  |             |

|          |           |              |                                                                                                         |                                                                        |                                                                                             |                                                                                                        |   |      |  |     |
|----------|-----------|--------------|---------------------------------------------------------------------------------------------------------|------------------------------------------------------------------------|---------------------------------------------------------------------------------------------|--------------------------------------------------------------------------------------------------------|---|------|--|-----|
| 208      | C170G224T |              |                                                                                                         |                                                                        |                                                                                             |                                                                                                        |   |      |  |     |
| KC906209 | 80719     | 1913214G199T | No significant similarity found                                                                         | Lacaria bicolor S238N-H82 predicted protein, accession: XP_001880772.1 | RF+3: 40-425, Anticodon_Ia_like superfamily (anticodon binding site & tRNA binding surface) | Lacaria bicolor S238N-H82 hyprothetical protein partial mRNA, accession: XM_001880737.1                | 1 | 4177 |  | 252 |
| KC906210 | 758       | 1921014G210T | Clitocybe candicans isolate AFTOL-1D 541 18 ribosomal RNA gene, partial sequence, Accession: AY771609.1 | Acinetobacter sp. P8-3-8 hypothetical protein, accession: ZP_0914283.1 |                                                                                             | Psilocybe montana isolate AFTOL-1D 820 18S ribosomal RNA gene, partial sequence, accession: DQ465342.1 | 0 |      |  |     |
| KC906216 | 669       | 202160C      | No significant similarity found                                                                         | Trametes versicolor FP-101664 SS1 hypothetical protein TRAVEDRAF       |                                                                                             | No high similarity sequence over 40%                                                                   | 0 |      |  |     |

|   |   |    |             |                                                          |  |                                           |   |  |  |   |
|---|---|----|-------------|----------------------------------------------------------|--|-------------------------------------------|---|--|--|---|
| 1 |   | 19 |             | T_146600,<br>accession:<br>EIW60909.1                    |  |                                           |   |  |  |   |
| 1 |   | 3  |             |                                                          |  |                                           |   |  |  |   |
|   |   | G  |             |                                                          |  |                                           |   |  |  |   |
|   |   | 11 |             |                                                          |  |                                           |   |  |  |   |
|   |   | 4  |             |                                                          |  |                                           |   |  |  |   |
|   |   | T  |             |                                                          |  |                                           |   |  |  |   |
| K |   | 33 |             |                                                          |  |                                           |   |  |  |   |
| C |   | 7  |             |                                                          |  |                                           |   |  |  |   |
| 9 | 1 | A  | No          | Laccaria bicolor                                         |  | No high                                   |   |  |  |   |
| 0 | 0 | 17 | significant | S238N-H82                                                |  | similarity                                |   |  |  |   |
| 6 | 6 | 9  | similarity  | predicted                                                |  | sequence over                             | 0 |  |  |   |
| 2 | 1 | C  | found       | protein,<br>accession:<br>XP_001883620.<br>1             |  | 40%                                       |   |  |  |   |
| 1 |   | 20 |             |                                                          |  |                                           |   |  |  |   |
| 2 |   | 0  |             |                                                          |  |                                           |   |  |  |   |
|   |   | G  |             |                                                          |  |                                           |   |  |  |   |
|   |   | 34 |             |                                                          |  |                                           |   |  |  |   |
|   |   | 5  |             |                                                          |  |                                           |   |  |  |   |
|   |   | T  |             |                                                          |  |                                           |   |  |  |   |
| K |   | 22 |             |                                                          |  |                                           |   |  |  |   |
| C |   | 1  |             |                                                          |  |                                           |   |  |  |   |
| 9 | 7 | A  | No          | Laccaria bicolor                                         |  | Volariella                                |   |  |  |   |
| 0 | 7 | 18 | significant | S238N-H82                                                |  | volvacea                                  | 1 |  |  |   |
| 6 | 7 | 0  | similarity  | glycoside                                                |  | endoglucanase                             | 8 |  |  |   |
| 2 | 9 | C  | found       | family 5                                                 |  | (egl) mRNA                                | 4 |  |  | 8 |
| 1 |   | 20 |             | protein,<br>accession:<br>XP_001879429.<br>1/ Volvarella |  | complete cds,<br>accession:<br>EU716328.1 | - |  |  | 2 |
| 3 |   | 1  |             | volvacea                                                 |  |                                           | 4 |  |  |   |
|   |   | G  |             | endoglucanase,<br>accession:<br>ACE06751.1               |  |                                           | 9 |  |  |   |
|   |   | 17 |             |                                                          |  |                                           | 0 |  |  |   |
|   |   | 7  |             |                                                          |  |                                           |   |  |  |   |
|   |   | T  |             |                                                          |  |                                           |   |  |  |   |
| K |   | 20 |             |                                                          |  |                                           |   |  |  |   |
| C | 8 | 3  | No          | No significant                                           |  | No significant                            |   |  |  |   |
| 9 | 6 | A  | significant | similarity found                                         |  | similarity found                          | 0 |  |  |   |
| 0 | 8 | 19 | similarity  |                                                          |  |                                           |   |  |  |   |
| 6 |   | 4  | found       |                                                          |  |                                           |   |  |  |   |
| 2 |   | C  |             |                                                          |  |                                           |   |  |  |   |

|                                      |                  |                                                              |                                                                                             |                                                                         |                                                                                                                               |                                                                                             |   |                                 |  |  |             |
|--------------------------------------|------------------|--------------------------------------------------------------|---------------------------------------------------------------------------------------------|-------------------------------------------------------------------------|-------------------------------------------------------------------------------------------------------------------------------|---------------------------------------------------------------------------------------------|---|---------------------------------|--|--|-------------|
| 1<br>4                               |                  | 25<br>1<br>G<br>22<br>0<br>T                                 |                                                                                             |                                                                         |                                                                                                                               |                                                                                             |   |                                 |  |  |             |
| K<br>C<br>9<br>0<br>6<br>2<br>1<br>5 | 3<br>3<br>6      | 82<br>A<br>84<br>C<br>87<br>G<br>83<br>T                     | No significant similarity found                                                             | No significant similarity found                                         |                                                                                                                               | No high similarity sequence covered 50%                                                     | 0 |                                 |  |  |             |
| K<br>C<br>9<br>0<br>6<br>2<br>1<br>6 | 1<br>0<br>7<br>4 | 27<br>4<br>A<br>27<br>2<br>C<br>27<br>2<br>G<br>25<br>6<br>T | Hypsizygos marmoreus heat shock protein 70 (HSP70) mRNA complete cds, Accession: GQ246176.1 | Hypsizygos marmoreus heat shock protein 70, Accession: ACT33635.1       | RF+3: 10-1045, NAD-GH (superfamilies); RF-2: 562-1065, NBD_sugar-kinase_HS P70_actin superfamily ; RF-2: dnaK (Multi-domains) | Hypsizygos marmoreus heat shock protein 70 (HSP70) mRNA complete CDS, Accession: GQ246176.1 | 1 | 6<br>3<br>-<br>1<br>7<br>0<br>4 |  |  | 3<br>0<br>2 |
| K<br>C<br>9<br>0<br>6<br>2<br>1<br>7 | 3<br>0<br>2      | 79<br>A<br>71<br>C<br>89<br>G<br>63<br>T                     | No significant similarity found                                                             | Laccaria bicolor S238N-H82 predicted protein, accession: XP_001879074.1 | RF-2: 183-273, mre11; RF-3: 53-123, mre11                                                                                     | Laccaria bicolor S238N-H82 predicted protein, accession: XP_001879039.1                     | 0 |                                 |  |  |             |

|                                      |                                  |                                                              |                                                                                                                     |                                                                                                                                                                                                                |                                                                                                                                                                                    |                                                                                                               |                                 |   |  |             |
|--------------------------------------|----------------------------------|--------------------------------------------------------------|---------------------------------------------------------------------------------------------------------------------|----------------------------------------------------------------------------------------------------------------------------------------------------------------------------------------------------------------|------------------------------------------------------------------------------------------------------------------------------------------------------------------------------------|---------------------------------------------------------------------------------------------------------------|---------------------------------|---|--|-------------|
| K<br>C<br>9<br>0<br>6<br>2<br>1<br>8 | 1<br>0<br>7<br>4<br>1<br>9       | 27<br>5<br>A<br>27<br>2<br>C<br>27<br>1<br>G<br>25<br>6<br>T | Hypsizygos<br>marmoreus<br>heat shock<br>protein 70<br>(HSP70)<br>mRNA<br>complete cds,<br>Accession:<br>GQ246176.1 | Hypsizygos<br>marmoreus heat<br>shock protein<br>70, Accession:<br>ACT33635.1                                                                                                                                  | RF+3:<br>10-1045,<br>NAD-GH<br>(Superfamil<br>ies); RF-2:<br>555-1071,<br>NBD_sugar<br>-kinase_HS<br>P70_actin<br>superfamily<br>; RF-2:<br>1-1074,<br>dnaK<br>(Multi-dom<br>ains) | Hypsizygos<br>marmoreus heat<br>shock protein 70<br>(HSP70) mRNA<br>complete CDS,<br>Accession:<br>GQ246176.1 | 6<br>3<br>-<br>1<br>7<br>0<br>4 |   |  | 3<br>0<br>2 |
| K<br>C<br>9<br>0<br>6<br>2<br>1<br>9 | 7<br>4<br>5<br>8<br>19<br>4<br>T | 17<br>0<br>A<br>20<br>3<br>C<br>17<br>8<br>G<br>19<br>4<br>T | No<br>significant<br>similarity<br>found                                                                            | Coprinopsis<br>cinere<br>F-box/WD<br>repeat-containin<br>g protein 11,<br>accession:<br>XP_001832905.<br>2 / Stereum<br>hirsutmu<br>FP-91666 SS1<br>WD40<br>repeat-like<br>protein,<br>accession<br>EIM89687.1 | RF+1:<br>235-700,<br>WD40<br>superfamily<br>(structural<br>tetrad);<br>RF+1:<br>235-700,<br>COG2319<br>(Multi-dom<br>ains)                                                         | No significant<br>similarity found                                                                            | 0                               |   |  |             |
| K<br>C<br>9<br>0<br>6<br>2<br>2<br>2 | 1<br>1<br>4<br>6<br>C<br>28      | 26<br>9<br>A<br>28<br>6<br>C<br>28                           | No<br>significant<br>similarity<br>found                                                                            | Sterpula<br>lacrymans var.<br>lacrymans S7.9<br>hypothetical<br>protein<br>SERLADRAFT<br>_443947,                                                                                                              | RF-2:<br>75-445,<br>OTU-domai<br>n-containin<br>g protein<br>(Superfamil<br>ies)                                                                                                   | No significant<br>similarity found                                                                            | 4<br>8<br>-<br>9<br>8<br>0      | 1 |  | 2<br>7<br>0 |



|                                      |                  |                                                              |                                          |                                                                                                                                                                                                                                  |                                                                                                                                                  |                                                                                                 |   |                                 |  |             |
|--------------------------------------|------------------|--------------------------------------------------------------|------------------------------------------|----------------------------------------------------------------------------------------------------------------------------------------------------------------------------------------------------------------------------------|--------------------------------------------------------------------------------------------------------------------------------------------------|-------------------------------------------------------------------------------------------------|---|---------------------------------|--|-------------|
| 0                                    |                  | 9<br>G<br>30<br>2<br>T                                       |                                          | accession:<br>EGO18612.1                                                                                                                                                                                                         |                                                                                                                                                  |                                                                                                 |   |                                 |  |             |
| K<br>C<br>9<br>0<br>6<br>2<br>2<br>1 | 4<br>2<br>5      | 11<br>3<br>A<br>10<br>7<br>C<br>11<br>3<br>G<br>97<br>T      | No<br>significant<br>similarity<br>found | Laccaria bicolor<br>S238N-H82<br>predicted<br>protein,<br>accession:<br>XP_001874648.<br>1 / Agaricus<br>bisporus var.<br>burnettii JB<br>137-S8<br>hypothetical<br>protein<br>AGABI2DRAF<br>T_54902,<br>accession<br>EKM81845.1 | RF-1:<br>320-423,<br>snRNP<br>component<br>HSH155<br>(Multi-dom<br>ains); RF-2:<br>5-272,<br>snRNP<br>component<br>HSH155<br>(Multi-dom<br>ains) | Agaricus<br>bisporus clone<br>FWBA189-L19,<br>complete<br>sequence,<br>accession:<br>AC253834.1 | 0 |                                 |  |             |
| K<br>C<br>9<br>0<br>6<br>2<br>2<br>2 | 1<br>3<br>5<br>2 | 35<br>9<br>A<br>31<br>9<br>C<br>30<br>9<br>G<br>36<br>5<br>T | No<br>significant<br>similarity<br>found | Agaricus<br>bisporus var.<br>bisporus H97<br>hypothetical<br>protein<br>AGABI2DRAF<br>T_141320,<br>accession:<br>EKV50458.1                                                                                                      | RF=1:<br>10-250,<br>MutS_I<br>(Superfamil<br>ies)                                                                                                | No significant<br>similarity found                                                              | 1 | 4<br>9<br>-<br>1<br>3<br>1<br>5 |  | 3<br>4<br>3 |
| K<br>C<br>9<br>0<br>0                | 5<br>2<br>0      | 14<br>9<br>A<br>11                                           | No<br>significant<br>similarity          | No significant<br>similarity found                                                                                                                                                                                               |                                                                                                                                                  | No significant<br>similarity found                                                              | 1 | 6<br>3<br>-<br>1                |  | 4<br>4      |

|                                      |                  |                                                              |                                                                                              |                                                                    |                                                                                                                                                        |                                                                                              |                                 |   |  |             |
|--------------------------------------|------------------|--------------------------------------------------------------|----------------------------------------------------------------------------------------------|--------------------------------------------------------------------|--------------------------------------------------------------------------------------------------------------------------------------------------------|----------------------------------------------------------------------------------------------|---------------------------------|---|--|-------------|
| 6<br>2<br>2<br>3                     |                  | 5<br>C<br>12<br>6<br>G<br>13<br>0<br>T                       | found                                                                                        |                                                                    |                                                                                                                                                        |                                                                                              | 9<br>9                          |   |  |             |
| K<br>C<br>9<br>0<br>6<br>2<br>2<br>4 | 1<br>0<br>7<br>4 | 27<br>4<br>A<br>27<br>4<br>C<br>27<br>1<br>G<br>25<br>5<br>T | Hypsizygyus marmoreus heat shock protein 70 (HSP70) mRNA complete cds (GQ246176.1 )          | Hypsizygyus marmoreus heat shock protein 70, Accession: ACT33635.1 | RF+3:<br>10-1050,<br>NAD-GH;<br>RF-2:<br>565-1060,<br>NBD_sugar<br>-kinase_HS<br>P70_actin<br>superfamily<br>; 460-535,<br>dnaK<br>(Multi-dom<br>ains) | Hypsizygyus marmoreus heat shock protein 70 (HSP70) mRNA complete CDS, Accession: GQ246176.1 | 6<br>3<br>-<br>1<br>0<br>7<br>4 | 1 |  | 3<br>0<br>2 |
| K<br>C<br>9<br>0<br>6<br>2<br>2<br>5 | 1<br>0<br>7<br>4 | 25<br>5<br>A<br>27<br>2<br>C<br>27<br>4<br>G<br>27<br>3<br>T | Hypsizygyus marmoreus heat shock protein 70 (HSP70) mRNA complete cds, Accession: GQ246176.1 | Hypsizygyus marmoreus heat shock protein 70, Accession: ACT33635.1 | RF+2:<br>1-505,<br>NBD_sugar<br>-kinase_HS<br>P70_actin<br>superfamily<br>; 545-605,<br>dnak<br>(Mult-doma<br>ins); RF-3:<br>25-1060,<br>NAD-GH        | Hypsizygyus marmoreus heat shock protein 70 (HSP70) mRNA complete CDS, Accession: GQ246176.1 | 1<br>-<br>1<br>0<br>1<br>2      | 1 |  | 3<br>0<br>2 |
| K<br>C<br>9<br>0                     | 6<br>4<br>7      | 18<br>9<br>A<br>18                                           | Laccaria bicolor S238N-H82 hypothetical                                                      | Laccaria bicolor S238N-H82 predicted protein,                      | RF-3:<br>305-625,<br>thymidylate<br>synthase_P                                                                                                         | No high similarity sequence over                                                             | 0                               |   |  |             |

|                                      |                                                              |                                                                                                                  |                                                                                                                                                                                       |                                                                                                       |                                                                                                                     |                                 |  |  |  |        |
|--------------------------------------|--------------------------------------------------------------|------------------------------------------------------------------------------------------------------------------|---------------------------------------------------------------------------------------------------------------------------------------------------------------------------------------|-------------------------------------------------------------------------------------------------------|---------------------------------------------------------------------------------------------------------------------|---------------------------------|--|--|--|--------|
| 6<br>2<br>2<br>6                     | 0<br>C<br>14<br>7<br>G<br>13<br>1<br>T                       | protein partial<br>mRNA,<br>Accession:<br>XM_0018894<br>59.1                                                     | accession:<br>XP_001889494.<br>1                                                                                                                                                      | yrimidine_<br>HMase<br>superfamily<br>(Multi-domain)                                                  | 50%                                                                                                                 |                                 |  |  |  |        |
| K<br>C<br>9<br>0<br>6<br>2<br>2<br>7 | 13<br>2<br>A<br>14<br>7<br>C<br>18<br>0<br>G<br>18<br>8<br>T | Laccaria<br>bicolor<br>S238N-H82<br>hypothetical<br>protein partial<br>mRNA,<br>Accession:<br>XM_0018894<br>59.1 | Laccaria bicolor<br>S238N-H82<br>predicted<br>protein,<br>accession:<br>XP_001889494.<br>1                                                                                            | RF+2:<br>15-345,<br>thymidylate<br>synthase_P<br>yrimidine_<br>HMase<br>superfamily<br>(Multi-domain) | No high<br>similarity<br>sequence over<br>53%                                                                       | 0                               |  |  |  |        |
| K<br>C<br>9<br>0<br>6<br>2<br>2<br>9 | 11<br>4<br>A<br>10<br>0<br>C<br>99<br>G<br>12<br>7<br>T      | No<br>significant<br>similarity<br>found                                                                         | Agaricus<br>bisporus var<br>burnettii<br>JB137-S8<br>hypothetical<br>protein,<br>accession:<br>EKW80790.1 /<br>Agaricus<br>bisporus var.<br>bisporus H97,<br>accession:<br>EKV47257.1 | RF+2:<br>125-425,<br>CypX<br>superfamily                                                              | Coprinosis<br>cinerea okayama<br>7#130 SeqLit<br>hypothetical<br>protein, mRNA,<br>accession:<br>XM_001830362.<br>2 | 1<br>5<br>5<br>-<br>4<br>2<br>9 |  |  |  | 7<br>8 |
